# Supplementary material for: Lotus japonicus karrikin receptors display divergent ligand-binding specificities and organ-dependent redundancy
Source: PLoS Genet. 2020 Dec 28;16(12):e1009249. doi: 10.1371/journal.pgen.1009249 (PMC7808659; doi:10.1371/journal.pgen.1009249)
Supplement: S5 Table — (DOCX) [file pgen.1009249.s018.docx]

**S5 Table.** Results of ANOVA for multiple comparisons.

| **Figure** | **genotype/treatment/gene** | ***post hoc* test** | **p-value** | **F-value** |
| --- | --- | --- | --- | --- |
| Fig. 2A | - | Tukey | ≤ 0.001 | F14/1438 = 125.3 |
| Fig. 2C | - | Tukey | ≤ 0.001 | F11/132 = 45.6 |
| Fig. 3B | WT (Ler) | Tukey | ≤ 0.001 | F2/311 = 244 |
| *kai2-2* | = 0.18 | F2/300 = 1.71 |
| *AtKAI2 #1* | ≤ 0.001 | F2/122 = 31.9 |
| *AtKAI2 #3* | ≤ 0.001 | F2/303 = 116.4 |
| *LjKAI2a #10b* | ≤ 0.001 | F2/316 = 65.7 |
| *LjKAI2a #11b* | ≤ 0.001 | F2/313 = 42 |
| *LjKAI2b #1b* | ≤ 0.001 | F2/296 = 33.4 |
| *LjKAI2b #5b* | ≤ 0.001 | F2/288 = 87.4 |
| Fig. 3C | WT (Col) | Tukey | ≤ 0.001 | F2/311 = 158.3 |
| K02821 | ≤ 0.001 | F2/353 = 100.3 |
| WT (Ler) | ≤ 0.001 | F2/384 = 499.6 |
| *htl-2* | ≤ 0.05 | F2/391 = 3.2 |
| #18 | ≤ 0.001 | F2/383 = 104.8 |
| #23 | ≤ 0.001 | F2/253 = 127 |
| Fig. 3D | WT (Col) | Tukey | ≤ 0.001 | F2/415 = 1008 |
| *d14-1 kai2-2* | = 0.22 | F2/353 = 1.54 |
| *LjKAI2a #32* | ≤ 0.001 | F2/287 = 50 |
| *LjKAI2a #46* | ≤ 0.001 | F2/184 = 85 |
| *LjKAI2b #29* | ≤ 0.001 | F2/283 = 9.4 |
| *LjKAI2b #31* | ≤ 0.05 | F2/244 = 3.9 |
| Fig. 4B | LjKAI2a | Dunnett | ≤ 0.0001 | F5/12 = 96.1 |
| LjKAI2aM160,L190 | ≤ 0.001 | F5/12 = 9.5 |
| LjKAI2aM160,L190, W157 | = 0.227 | F5/12 = 1.63 |
| LjKAI2a W157 | ≤ 0.05 | F5/12 = 4.17 |
| LjKAI2b | = 0.632 | F5/12 = 0.70 |
| LjKAI2bL161,M191 | = 0.001 | F5/12 = 8.9 |
| LjKAI2b L161,M191,F158 | ≤ 0.0001 | F5/12 = 56.9 |
| LjKAI2bF158 | ≤ 0.0001 | F5/12 = 29.54 |
| Fig. 6C | - | Tukey | ≤ 0.001 | F6/103 = 35 |
| Fig. 6D | - | Tukey | ≤ 0.001 | F4/67 = 19.9 |
| Fig. 6E | - | Tukey | ≤ 0.001 | F6/605 = 26.5 |
| Fig. 7A | KAR1 PRL | Tukey | ≤ 0.001 | F3/209 = 7.40 |
| KAR1 PER | ≤ 0.001 | F3/209 = 11.1 |
| KAR1 PER density | ≤ 0.01 | F3/209 = 5.51 |
| KAR2 PRL | = 0.51 | F3/217 = 0.77 |
| KAR2 PER | = 0.18 | F3/217 = 1.64 |
| KAR2 PER density | = 0.72 | F3/217 = 0.44 |
| *rac*-GR24 PRL | = 0.74 | F3/203 = 0.42 |
| *rac*-GR24 PER | = 0.07 | F3/203 = 2.45 |
| *rac*-GR24 PER density | = 0.43 | F3/203 = 0.92 |
| Fig. 7B | - | Dunnett | ≤ 0.01 | F3/188 = 4.08 |
| Fig. 7C | WT | Tukey | ≤ 0.001 | F2/9 = 30.7 |
| *max2-4* | = 0.20 | F2/9 = 1.97 |
| Fig. 8A | - | Tukey | ≤ 0.001 | F4/300 = 8.69 |
| Fig. S8A | *KAI2a* | Tukey | ≤ 0.001 | F5/18 = 39.5 |
| *KAI2b* | ≤ 0.001 | F5/18 = 33.7 |
| Fig. S9D | - | Tukey | ≤ 0.001 | F9/714 = 178.8 |
| Fig. S10B | KAR1 | Tukey | ≤ 0.001 | F3/396 = 33.1 |
| KAR2 | ≤ 0.001 | F3/390 = 16.5 |
| *rac*-Gr24 | ≤ 0.001 | F3/392 = 35 |
| Fig. S10C | WT | Dunnett | ≤ 0.001 | F2/313 = 30 |
| *kai2a-1* | = 0.08 | F2/234 = 2.51 |
| *kai2b-1* | ≤ 0.001 | F2/302 = 29.3 |
| *kai2b-3* | ≤ 0.001 | F2/308 = 14.2 |
| *kai2a-1 kai2b-1* | = 0.99 | F2/272 = 0.01 |
| Fig. S10D | WT | Dunnett | ≤ 0.001 | F2/246 = 51 |
| *max2-4* | = 0.25 | F2/204 = 1.38 |
| Fig. S10E | WT | Dunnett | ≤ 0.001 | F3/8 = 28.4 |
| *kai2a-1* | ≤ 0.001 | F3/8 = 53 |
| *kai2b-3* | ≤ 0.001 | F3/8 = 26 |
| *kai2a-1 kai2b-1* | ≤ 0.001 | F3/8 = 105.8 |
| *max2-4* | = 0.99 | F3/8 = 0.04 |
